# Supplementary material for: The Human Kinome Targeted by FDA Approved Multi-Target Drugs and Combination Products: A Comparative Study from the Drug-Target Interaction Network Perspective
Source: PubMed Central journal article supplement (PMC5102354; doi:10.1371/journal.pone.0165737), 2016-11-09
Supplement: pone.0165737.s003.pdf [file pone.0165737.s003.pdf]

S2 Table. A list of FDA approved multi-target drugs together with their corresponding approval indications and primary therapeutic targets.

| <b>Drug Name</b> | <b>Code of ICD class</b> | <b>Disease indication</b>                                                  | <b>Target Name</b>                         |
|------------------|--------------------------|----------------------------------------------------------------------------|--------------------------------------------|
| Afatinib         | C00-D49                  | Metastatic non-small cell lung cancer                                      | EGFR; HER2                                 |
| Bosutinib        | C00-D49                  | Ph+ chronic myelogenous leukemia                                           | ABL; Src                                   |
| Cabozantinib     | C00-D49                  | Metastatic medullary thyroid cancer                                        | MET; VEGFR2                                |
| Dasatinib        | C00-D49                  | Chronic myelogenous and acute lymphoblastic leukemia                       | ABL; Src                                   |
| Imatinib         | C00-D49                  | Ph+ chronic myelogenous leukemia                                           | ABL; PDGFR- $\beta$ ; c-Kit                |
| Lapatinib        | C00-D49                  | HER2-positive metastatic breast cancer                                     | EGFR; HER2                                 |
| Lenvatinib       | C00-D49                  | RAI-refractory differentiated thyroid cancer                               | VEGFR2; c-Kit                              |
| Nintedanib       | J00-J99                  | Idiopathic pulmonary fibrosis                                              | VEGFR2; PDGFR- $\alpha$ ; PDGFR- $\beta$   |
| Palbociclib      | C00-D49                  | ER-positive and HER2-negative breast cancer                                | CDK4; CDK6                                 |
| Pazopanib        | C00-D49                  | Renal cell carcinoma and soft tissue sarcoma                               | VEGFR2; c-Kit; PDGFR- $\beta$              |
| Ponatinib        | C00-D49                  | Chronic myeloid and acute lymphoblastic leukemia                           | ABL; c-Kit                                 |
| Regorafenib      | C00-D49                  | Metastatic colorectal cancer and advanced gastrointestinal stromal tumor   | VEGFR2; c-Kit                              |
| Sorafenib        | C00-D49                  | Renal cell carcinoma and unresectable hepatocellular carcinomas            | RET; VEGFR2; PDGFR- $\beta$ ; B-Raf; c-Kit |
| Sunitinib        | C00-D49                  | Renal cell carcinoma and imatinib-resistant gastrointestinal stromal tumor | VEGFR2; c-Kit; PDGFR- $\beta$              |
| Vandetanib       | C00-D49                  | Medullary thyroid cancer                                                   | EGFR; VEGFR2                               |
