# Supplementary material for: The Human Kinome Targeted by FDA Approved Multi-Target Drugs and Combination Products: A Comparative Study from the Drug-Target Interaction Network Perspective
Source: PubMed Central journal article supplement (PMC5102354; doi:10.1371/journal.pone.0165737), 2016-11-09
Supplement: pone.0165737.s004.pdf [file pone.0165737.s004.pdf]

S3 Table. A list of FDA approved combination products together with their corresponding approval indications and primary therapeutic targets.

| <b>Drug Name</b>           | <b>No. of Drugs</b> | <b>Code of ICD class</b> | <b>Disease indication</b>                              | <b>Target Name</b>                                           |
|----------------------------|---------------------|--------------------------|--------------------------------------------------------|--------------------------------------------------------------|
| Cobimetinib + Vemurafenib  | 2                   | C00-D49                  | Unresectable or metastatic melanoma                    | MEK (Cobimetinib)<br>B-Raf (Vemurafenib)                     |
| Dabrafenib + Trametinib    | 2                   | C00-D49                  | Unresectable or metastatic melanoma                    | B-Raf (Dabrafenib)<br>MEK (Trametinib)                       |
| Erlotinib + Gemcitabine    | 2                   | C00-D49                  | Advanced, unresectable or metastatic pancreatic cancer | EGFR (Erlotinib)<br>Ribonucleotide reductase (Gemcitabine)   |
| Lapatinib + Capecitabine   | 2                   | C00-D49                  | Advanced or metastatic breast cancer                   | EGFR (Lapatinib)<br>Thymidylate synthase (Capecitabine)      |
| Lapatinib + Letrozole      | 2                   | C00-D49                  | Hormone receptor positive metastatic breast cancer     | EGFR (Lapatinib)<br>Aromatase (Letrozole)                    |
| Palbociclib + Letrozole    | 2                   | C00-D49                  | ER-positive,HER2-negative advanced breast cancer       | CDK4, CDK6 (Palbociclib)<br>Aromatase (Letrozole)            |
| Ramucirumab + Paclitaxel   | 2                   | C00-D49                  | Gastric or gastro-esophageal junction adenocarcinoma   | VEGFR2 (Ramucirumab)<br>Tubulin (Paclitaxel)                 |
| Ramucirumab + Docetaxel    | 2                   | C00-D49                  | Metastatic non-small cell lung cancer                  | VEGFR2 (Ramucirumab)<br>Tubulin (Docetaxel)                  |
| Tofacitinib + Methotrexate | 2                   | M00-M99                  | Moderately to severely active rheumatoid arthritis     | JAK3 (Tofacitinib)<br>Dihydrofolate reductase (Methotrexate) |
| Trastuzumab + Paclitaxel   | 2                   | C00-D49                  | HER2-overexpressing metastatic breast cancer           | HER2 (Trastuzumab)<br>Tubulin (Paclitaxel)                   |
| Idelalisib + Rituximab     | 2                   | C00-D49                  | Relapsed chronic lymphocytic leukemia                  | PI3K-delta (Idelalisib)<br>CD20 (Rituximab)                  |
| Cetuximab + Irinotecan     | 2                   | C00-D49                  | K-Ras wild-type, EGFR-expressing Colorectal Cancer     | EGFR (Cetuximab)<br>Type I topoisomerase (Irinotecan)        |

|                                                           |   |         |                                                                              |                                                                                                       |
|-----------------------------------------------------------|---|---------|------------------------------------------------------------------------------|-------------------------------------------------------------------------------------------------------|
| Cetuximab + 5-fluorouracil                                | 2 | C00-D49 | Squamous cell carcinoma of the head and neck                                 | EGFR (Cetuximab)<br>Thymidylate synthase (5-fluorouracil)                                             |
| Necitumumab + Gemcitabine + Cisplatin                     | 3 | C00-D49 | Metastatic squamous non-small cell lung cancer                               | EGFR (Necitumumab)<br>Ribonucleotide reductase (Gemcitabine)<br>Human DNA (Cisplatin)                 |
| Pertuzumab + Trastuzumab + Docetaxel                      | 3 | C00-D49 | HER2-positive metastatic breast cancer                                       | HER2 (Pertuzumab)<br>HER2 (Trastuzumab)<br>Tubulin (Docetaxel)                                        |
| Trastuzumab + Cisplatin + Capecitabine                    | 3 | C00-D49 | HER2-positive metastatic gastric or gastroesophageal junction adenocarcinoma | HER2 (Trastuzumab)<br>Human DNA (Cisplatin)<br>Thymidylate synthase (Capecitabine)                    |
| Trastuzumab + Cisplatin + 5-fluorouracil                  | 3 | C00-D49 | HER2-positive metastatic gastric or gastroesophageal junction adenocarcinoma | HER2 (Trastuzumab)<br>Human DNA (Cisplatin)<br>Thymidylate synthase (5-fluorouracil)                  |
| Trastuzumab + Docetaxel + Carboplatin                     | 3 | C00-D49 | HER2-positive breast cancer                                                  | HER2 (Trastuzumab)<br>Tubulin (Docetaxel)<br>Human DNA (Carboplatin)                                  |
| Trastuzumab + Doxorubicin + Cyclophosphamide + Paclitaxel | 4 | C00-D49 | HER2-positive breast cancer                                                  | HER2 (Trastuzumab)<br>Human DNA (Doxorubicin)<br>Human DNA (Cyclophosphamide)<br>Tubulin (Paclitaxel) |
| Trastuzumab + Doxorubicin + Cyclophosphamide + Docetaxel  | 4 | C00-D49 | HER2-positive breast cancer                                                  | HER2 (Trastuzumab)<br>Human DNA (Doxorubicin)<br>Human DNA (Cyclophosphamide)<br>Tubulin (Docetaxel)  |
